# Supplementary material for: Evaluation of Polymer Gel Electrolytes for Use in MnO2 Symmetric Flexible Electrochemical Supercapacitors
Source: Polymers (Basel). 2023 Aug 17;15(16):3438. doi: 10.3390/polym15163438 (PMC10458581; doi:10.3390/polym15163438)
Supplement: Supplementary file 1 [file polymers-15-03438-s001.zip › polymers-2551651-supplementary.pdf]

## Article

# Supplementary Materials: Evaluation of Polymer Gel Electrolytes for Use in MnO<sub>2</sub> Symmetric Flexible Electrochemical Supercapacitors

Yu-Hao Lin <sup>1</sup>, Wan-Tien Huang <sup>2</sup>, Yi-Ting Huang <sup>2</sup>, Yi-Ni Jhang <sup>2</sup>, Tsung-Ting Shih <sup>3</sup>, Murat Yilmaz <sup>4</sup> and Ming-Jay Deng <sup>2,\*</sup>

<sup>1</sup> Department of Environmental Engineering, National Chung Hsing University, Taichung 40227, Taiwan; 11844@yahoo.com.tw

<sup>2</sup> Department of Applied Chemistry, Providence University, Taichung 43301, Taiwan; angel20020402@gmail.com (W.-T.H.); lilyacer11@gmail.com (Y.-T.H.); hi190523@gmail.com (Y.-N.J.)

<sup>3</sup> Department of Chemistry, Fu Jen Catholic University, New Taipei City 24205, Taiwan; 142661@mail.fju.edu.tw

<sup>4</sup> Department of Chemical Engineering, Faculty of Engineering, Osmaniye Korkut Ata University, Osmaniye 80000, Turkey; muratyilmaz@osmaniye.edu.tr

\* Correspondence: dengmj1020@pu.edu.tw

## Preparation of MnO<sub>2</sub>/CC electrodes

The CC substrate, a cleaned film with an area of approximately 6 cm<sup>2</sup>, underwent pretreatment steps, including cleaning in deionized water for 2 minutes, immersion in 2 M HNO<sub>3</sub> for 10 minutes, rinsing with deionized water, and finally drying in a fume cupboard at room temperature. The deposition process was conducted at room temperature in a three-electrode cell with a Pt wire counter electrode and a saturated calomel reference electrode (SCE, CHI150, CH Instruments, Inc., USA) on an Autolab PGSTAT 128N potentiostat. A CC substrate with an area of approximately 4 cm<sup>2</sup> was used as the working electrode. The MnO<sub>2</sub> nanofiber layers were electrodeposited onto the CC substrate at 0.45 V using a solution containing 0.3 M Mn(CH<sub>3</sub>COO)<sub>2</sub> and 0.1 M CH<sub>3</sub>CO<sub>2</sub>NH<sub>4</sub> at room temperature. This process resulted in the assembly of the nanostructured MnO<sub>2</sub>/CC electrode, with a Pt wire counter electrode and a SCE as the reference electrode. Then, the MnO<sub>2</sub>/CC electrodes were completed. The typical mass of the deposited MnO<sub>2</sub> (12 Coulomb, 3 C/cm<sup>2</sup>), measured with a microbalance (XP105DR Mettler Toledo, accuracy 0.1 mg), was 4.8 mg (equivalent to 1.2 mg/cm<sup>2</sup> for the deposited area). The mass of dead components such as the electrolyte, CC, and separator (Kimwipe 34155, Kimberly-Clark Co., USA), was not considered as part of the active materials (one MnO<sub>2</sub> electrode with 4.8 mg or 1.2 mg/cm<sup>2</sup>).

## Electrochemical measurements:

The electrochemical potential windows of different DES-based systems were measured with cyclic voltammetry (CV) following a normal three-electrode system where a glassy carbon electrode (CHI104, CH Instruments, Inc., USA), an Ag electrode, and a Pt wire were utilized as working, and counter electrodes soaked in the DES-based electrolyte, respectively. The Ag reference electrode was made by soaking an Ag wire in the LO DES-based solution containing 5 mM silver triflate separated by a glass frit [27]. It shows a potential of −0.25 V vs. Ag/AgCl (3M KCl). After the test, the potential obtained through the three-electrode system was calibrated with respect to the ferrocene (Fc/Fc<sup>+</sup>) redox potential.

**Citation:** Lin, Y.-H.; Huang, W.-T.; Huang, Y.-T.; Jhang, Y.-N.; Shih, T.-T.; Yilmaz, M.; Deng, M.-J. Evaluation of Polymer Gel Electrolytes for Use in MnO<sub>2</sub> Symmetric Flexible Electrochemical Supercapacitors. *Polymers* **2023**, *15*, 3438. <https://doi.org/10.3390/polym15163438>

Academic Editor: Jeong In Han

Received: 26 July 2023

Revised: 11 August 2023

Accepted: 15 August 2023

Published: 17 August 2023

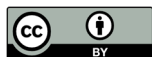

**Copyright:** © 2023 by the authors. Licensee MDPI, Basel, Switzerland. This article is an open access article distributed under the terms and conditions of the Creative Commons Attribution (CC BY) license (<https://creativecommons.org/licenses/by/4.0/>).

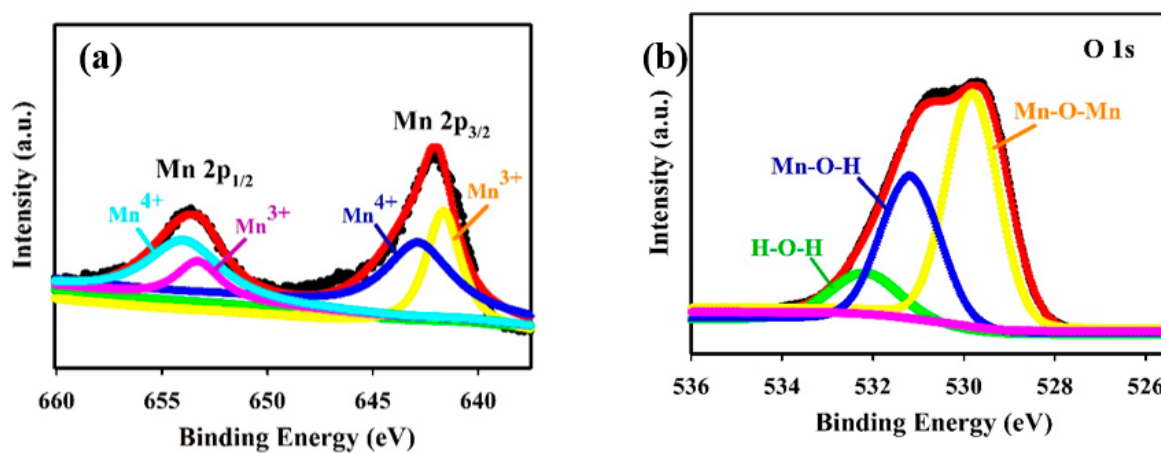

Figure S1. XPS spectra of (a) Mn 2p, and (b) O 1s of the as-prepared MnO<sub>2</sub>/CC electrode.

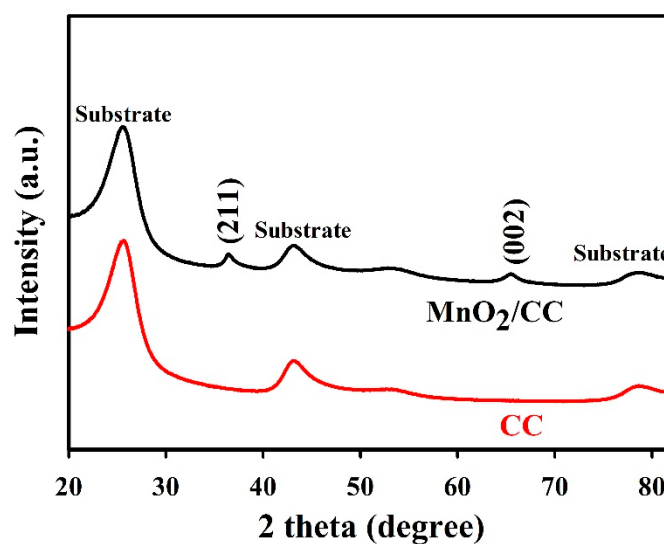

Figure S2. XRD patterns of MnO<sub>2</sub>/CC, and bare CC electrodes, respectively.

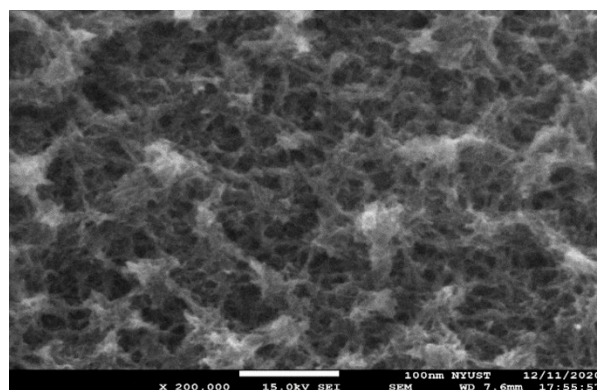

Figure S3. SEM micrographs of the MnO<sub>2</sub>/CC electrode after undergoing 5,000 GCD cycles with the PVA-LO polymer gel electrolyte.

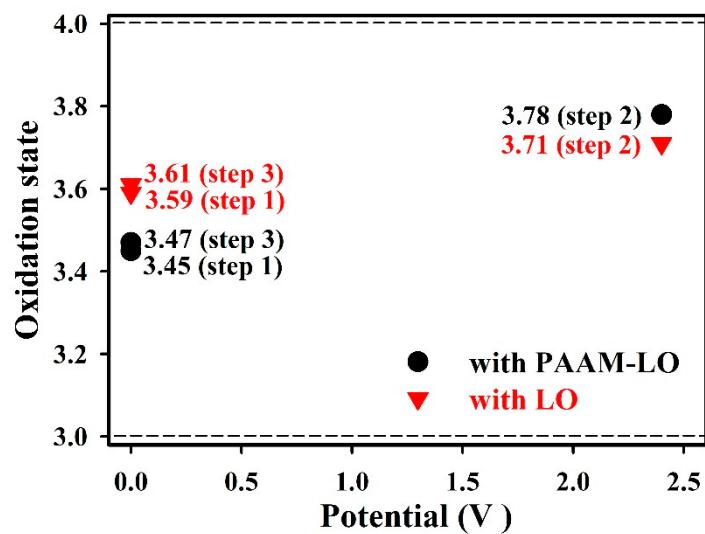

**Figure S4.** (c) Varies of Mn oxidation states ( $\text{MnO}_2$  symmetric FESC device PAAM-LO, and LO electrolytes) under different operating voltages.

**Disclaimer/Publisher's Note:** The statements, opinions and data contained in all publications are solely those of the individual author(s) and contributor(s) and not of MDPI and/or the editor(s). MDPI and/or the editor(s) disclaim responsibility for any injury to people or property resulting from any ideas, methods, instructions or products referred to in the content.
